# Supplementary material
Source: MDPI journal article supplement (https://www.mdpi.com/2072-4292/14/23/5954)
Supplement: s1 [file s1]

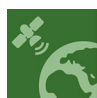

## Supplementary

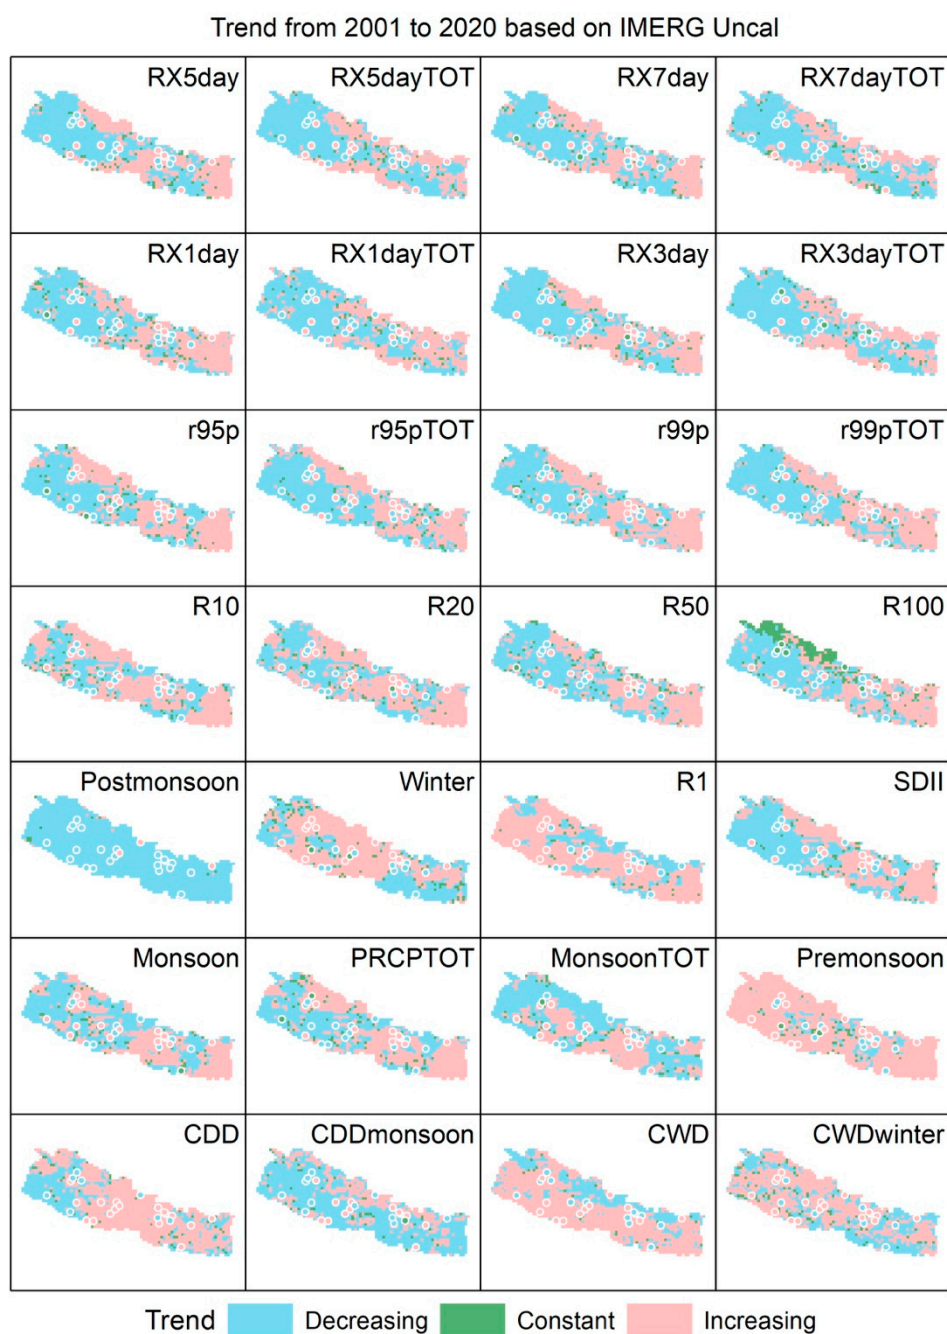

**Figure S1.** Spatial distribution of annual trend from 2001 to 2020 of selected 28 precipitation indices across Nepal based on IMERG\_Uncal dataset. Refer to A Table A1 for the details of indices. The color code used for precipitation stations (points) and background (grids) represents the same.

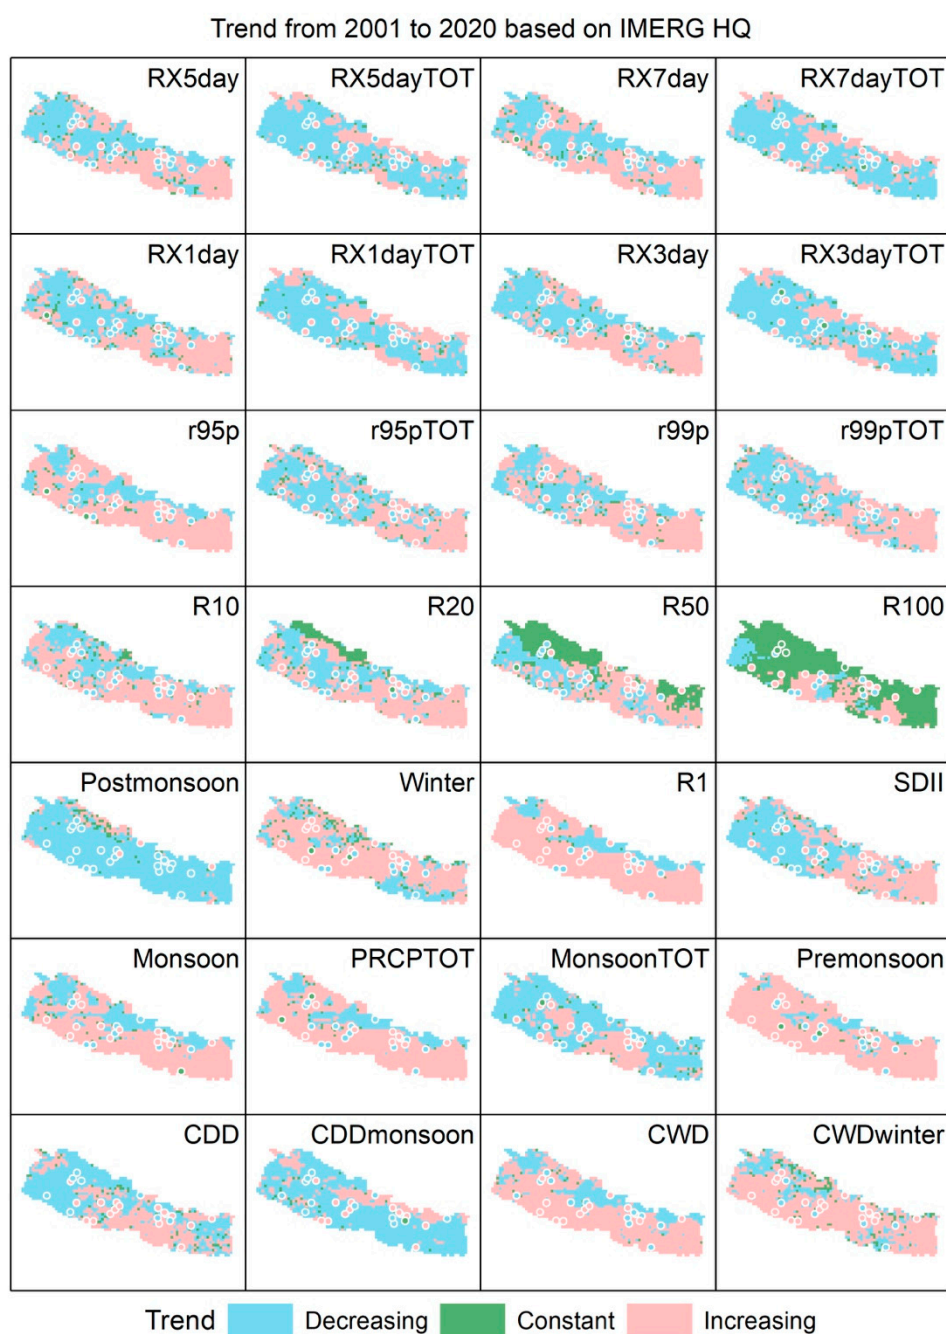

**Figure S2.** Spatial distribution of annual trend from 2001 to 2020 of selected 28 precipitation indices across Nepal based on IMERG\_Uncal dataset. Refer to A Table A1 for the details of indices. The color code used for precipitation stations (points) and background (grids) represents the same.

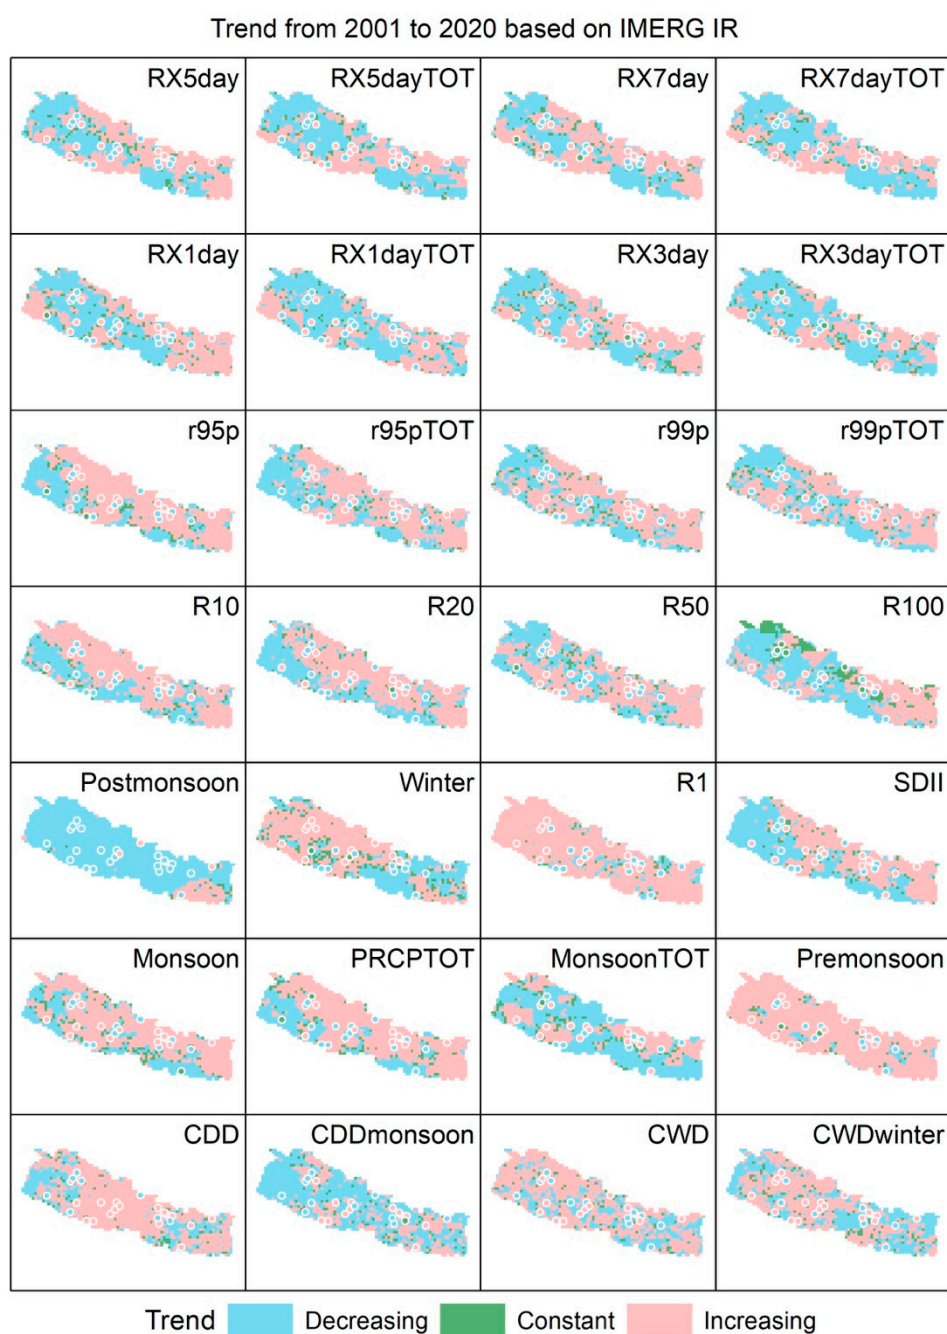

**Figure S3.** Spatial distribution of annual trend from 2001 to 2020 of selected 28 precipitation indices across Nepal based on IMERG\_IR dataset. Refer to A Table A1 for the details of indices. The color code used for precipitation stations (points) and background (grids) represents the same.
